# Supplementary material for: Out of stoichiometry CuCrO2 films as a promising p-type TCO for transparent electronics
Source: Royal Society of Chemistry journal article supplement (doi:10.1039/d1ma00156f), 2021-01-01
Supplement: d1ma00156f1.pdf [file d1ma00156f1.pdf]

Supporting Information:

**Out of stoichiometry CuCrO<sub>2</sub> films as promising p-type TCO for transparent electronics**

Lorenzo Bottiglieri\*<sup>a</sup>, João Resende<sup>b</sup>, Matthieu Weber<sup>a</sup>, Odette Chaix-Pluchery<sup>a</sup>, Carmen Jiménez<sup>a</sup>, Jean-Luc Deschanvres<sup>a</sup>

a. Univ. Grenoble Alpes, CNRS, Grenoble INP, LMGP, 38000 Grenoble, France

b. AlmaScience, Campus da Caparica, 2829-516 Caparica, Portugal

Email: [Lorenzo.bottiglieri@grenoble-inp.fr](mailto:Lorenzo.bottiglieri@grenoble-inp.fr)

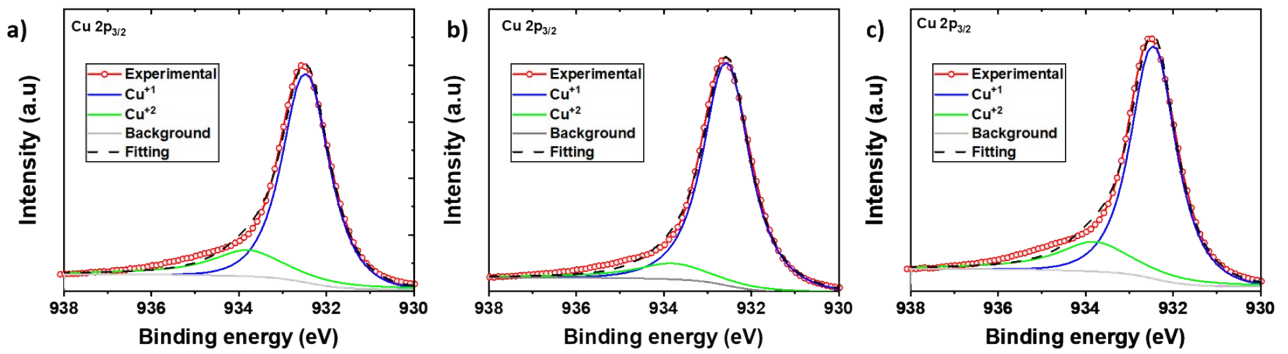

Figure S1. Cu  $2p_{3/2}$  experimental peak and its fitting for a) Cu-rich  $\text{CuCrO}_2$ :59%, b) Cu-rich  $\text{CuCrO}_2$ :65% and c)  $\text{Cu}_2\text{O}+\text{CuCrO}_2$ :73%.

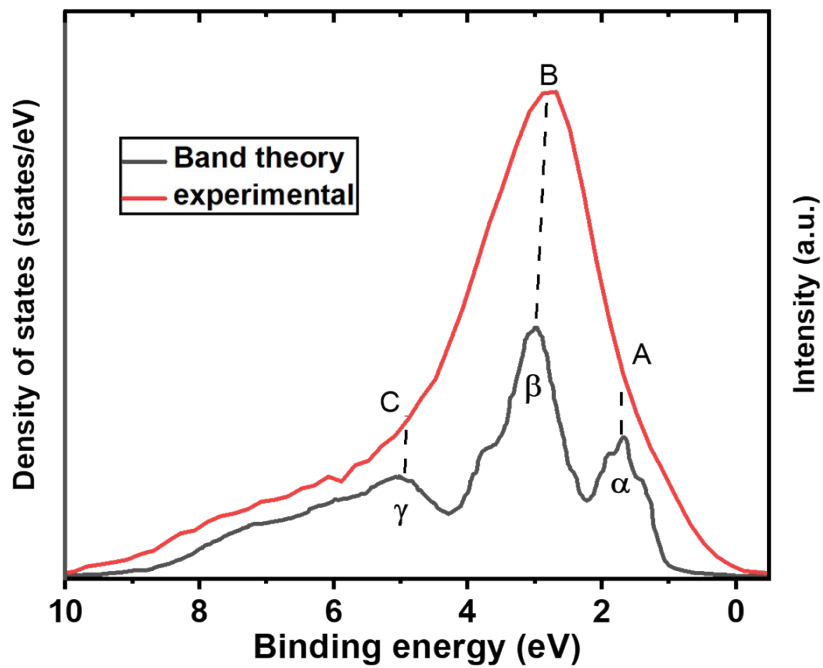

Figure S2. Comparison between the theoretical density of states of  $\text{CuCrO}_2$ , adapted by Yokobori *et al.*<sup>1</sup>, and the valence band spectra of Cu-rich  $\text{CuCrO}_2$  with  $\text{Cu}/(\text{Cu}+\text{Cr})=65\%$ . The energy zero was set to the Fermi level.

1. Yokobori, T. *et al.* Electronic structure of the hole-doped delafossite oxides  $\text{CuCr}_{1-x}\text{Mg}_x\text{O}_2$ . *Phys. Rev. B - Condens. Matter Mater. Phys.* **87**, (2013).
